1 **The reverse TCA cycle and reductive amino acid synthesis pathways contribute to electron**  
2 **balance in a *Rhodospirillum rubrum* Calvin cycle mutant**

3  
4 Alexandra L. McCully<sup>1,2†</sup>, Maureen C. Onyeziri<sup>1†</sup>, Breah LaSarre<sup>1</sup>, Jennifer R. Gliessman<sup>1</sup>,  
5 and James B. McKinlay<sup>1\*</sup>

6 <sup>1</sup>Department of Biology, Indiana University, Bloomington, IN

7 <sup>2</sup> Current address: Department of Civil and Environmental Engineering, Stanford University, CA

8 <sup>†</sup>Equal contributions.

9 \*Corresponding author, [jmckinla@indiana.edu](mailto:jmckinla@indiana.edu)

10  
11 **Abstract**

12 Purple nonsulfur bacteria (PNSB) use light for energy and organic substrates for carbon and  
13 electrons when growing photoheterotrophically. This lifestyle generates more reduced electron  
14 carriers than are required for biosynthesis. It is essential that this excess reducing power be  
15 oxidized for photoheterotrophic growth to occur. Diverse PNSB commonly rely on the CO<sub>2</sub>-  
16 fixing Calvin cycle to oxidize excess reducing power. Some PNSB additionally utilize H<sub>2</sub>  
17 production or reduction of electron acceptors, such as dimethylsulfoxide, as alternative reductive  
18 pathways to the Calvin cycle. *Rhodospirillum rubrum* Calvin cycle mutants defy this trend by  
19 growing phototrophically on relatively oxidized substrates like malate and fumarate without H<sub>2</sub>  
20 production or access to electron acceptors. How *Rs. rubrum* Calvin cycle mutants maintain  
21 electron balance under these conditions was unknown. Here, using <sup>13</sup>C-tracer experiments and  
22 physiological assays, we found that *Rs. rubrum* Calvin cycle mutants use a reductive arm of the  
23 tricarboxylic acid cycle when growing phototrophically on malate and fumarate. The reductive

24 synthesis of amino acids stemming from  $\alpha$ -ketoglutarate is also likely important for electron  
25 balance, as supplementing the growth medium with  $\alpha$ -ketoglutarate-derived amino acids  
26 prevented *Rs. rubrum* Calvin cycle mutant growth unless dimethylsulfoxide was provided as an  
27 electron acceptor. Fluxes estimated from  $^{13}\text{C}$ -tracer experiments also suggested the preferential  
28 use of a reductive isoleucine synthesis pathway when the Calvin cycle was genetically  
29 inactivated; however, this pathway was not essential for growth of a Calvin cycle mutant.

30

31 **Importance.** The lifestyle by which PNSB use organic carbon and light for energy comes with a  
32 challenge in managing electrons. Excess electrons from the organic substrates can be coupled to  
33 the assimilation of  $\text{CO}_2$  in the Calvin cycle, avoiding a buildup of reduced electron carriers that  
34 would halt metabolism. As an exception, *Rs. rubrum* can grow without the Calvin cycle when  
35 provided with light and relatively oxidized substrates. By tracking stable isotopes in a *Rs.*  
36 *rubrum* Calvin cycle mutant, we observed the reversal of an arm of the tricarboxylic acid cycle,  
37 feeding electron-requiring amino acid synthesis pathways. Providing the mutant with these  
38 amino acids prevented growth, suggesting that their synthesis is required for electron balance.  
39 Our results highlight the contribution of biosynthetic reactions to electron balance and the  
40 metabolic diversity that exists between PNSB, as most PNSB cannot grow without the Calvin  
41 cycle under the conditions used in this study.

42

### 43 **Introduction**

44 Purple nonsulfur bacteria (PNSB) are a metabolically versatile group that are often cultured  
45 under anaerobic conditions supporting photoheterotrophic growth, wherein light is used for  
46 energy and organic compounds are used for carbon and electrons. This lifestyle presents a

47 challenge in maintaining electron balance, as oxidative metabolic pathways generate an excess of  
48 reduced electron carriers, or reducing power (1, 2). Oxidation of excess reducing power is  
49 essential for growth and is often coupled to CO<sub>2</sub> fixation in the Calvin cycle. Calvin cycle  
50 mutants are generally incapable of photoheterotrophic growth unless another means of electron  
51 disposal is possible, such as reduction of electron acceptors, like dimethylsulfoxide (DMSO) (3-  
52 6), or H<sub>2</sub> production via nitrogenase (7-11). Such trends have been observed for several model  
53 PNSB including *Rhodobacter sphaeroides* (3, 4, 6, 11), *Rhodobacter capsulatus* (5, 12), and  
54 *Rhodospirillum rubrum* (7-10). An exception to this general observation is *Rhodospirillum*  
55 *rubrum*, for which mutants incapable of Calvin cycle activity can grow photoheterotrophically  
56 on relatively oxidized substrates, like malate and fumarate, without access to electron acceptors  
57 and without producing H<sub>2</sub> (8, 13). However, these alternative electron-balancing mechanisms  
58 were still required by *Rs. rubrum* Calvin cycle mutants for photoheterotrophic growth on more  
59 reduced substrates, like succinate (8). The mechanism by which *Rs. rubrum* Calvin cycle mutants  
60 maintain electron balance is unknown, but the fact that growth only occurs on relatively oxidized  
61 substrates suggests that there is a constraint on the number of excess electrons that can be dealt  
62 with in these mutants.

63  
64 Alternative central metabolic pathways that could maintain electron balance during phototrophic  
65 growth in the absence of the Calvin cycle have been explored in silico (14), and some have been  
66 ruled out. For example, phototrophic growth by Calvin cycle mutants on malate could be  
67 possible if the cells produced formate (14). However, we previously found that *Rs. rubrum*  
68 Calvin cycle mutants did not excrete formate, nor did they accumulate polyhydroxybutyrate, an  
69 electron rich storage polymer that could potentially help maintain electron balance (8). There is

70 also evidence that an alternative CO<sub>2</sub>-fixing pathway could be involved, given that an *Rs. rubrum*  
71 Calvin cycle mutant was observed to grow when CO<sub>2</sub> was the sole carbon source (15). The CO<sub>2</sub>-  
72 fixing ethylmalonyl-CoA pathway can substitute for the Calvin cycle to achieve electron balance  
73 during phototrophic growth on acetate (16). However, during phototrophic growth on malate, the  
74 ethylmalonyl-CoA pathway would not satisfy electron balance given that more reducing power  
75 would be made enroute to the ethylmalonyl-CoA pathway than could subsequently be oxidized  
76 by the ethylmalonyl-CoA pathway (14). Another CO<sub>2</sub>-fixing pathway that might participate in  
77 electron balance in *Rs. rubrum* Calvin cycle mutants is the reverse TCA cycle (14, 17).  
78  
79 Here we used <sup>13</sup>C-tracer experiments to gain insight into electron-balancing mechanisms in a *Rs.*  
80 *rubrum* Calvin cycle mutant. Labeling patterns suggested the involvement of a reductive arm of  
81 the TCA cycle from fumarate to  $\alpha$ -ketoglutarate ( $\alpha$ KG). This pathway feeds into reductive  
82 pathways for the synthesis of  $\alpha$ KG-derived amino acids. These amino acid synthesis pathways  
83 also likely contribute to electron balance, as adding  $\alpha$ KG-derived amino acids to the medium  
84 prevented photoheterotrophic growth of a Calvin cycle mutant on malate unless DMSO was  
85 added as an electron acceptor. Flux estimates from labeling experiments also revealed the  
86 preferential use of a reductive isoleucine synthesis pathway over an alternative pathway in the  
87 Calvin cycle mutant. Thus, *Rs. rubrum* appears to have flexibility within its innate biosynthetic  
88 pathways to satisfy electron balance during phototrophic growth on relatively oxidized  
89 substrates.

## 90 **Results and Discussion**

91 **<sup>13</sup>C-metabolic flux analysis of *Rs. rubrum* strains.** To gain insight into how *Rs. rubrum*  
92 maintains electron balance without the Calvin cycle during phototrophic growth on relatively  
93 oxidized substrates, we performed <sup>13</sup>C-metabolic flux analysis (<sup>13</sup>C-MFA) to estimate in vivo  
94 metabolic fluxes. In <sup>13</sup>C-MFA, the activities of different pathways generate signature patterns of  
95 <sup>12</sup>C and <sup>13</sup>C that are imprinted on proteinaceous amino acids, which can be deciphered using gas  
96 chromatography-mass spectrometry (GC-MS) (18). Software is then used to identify a set of  
97 fluxes that can explain the observed labeling patterns. Directly measured fluxes, such as those for  
98 excreted products and those needed to generate a defined biomass composition, are also taken  
99 into account. We grew wild-type (WT) *Rs. rubrum* and a Calvin cycle mutant lacking genes for  
100 phosphoribulokinase (PRK) and ribulose-1,5-bisphosphate carboxylase (RuBisCO), hereon  
101 referred to as the  $\Delta$ Calvin mutant, each in a defined medium with [1,4-<sup>13</sup>C]fumarate. Cells were  
102 harvested in exponential phase to determine mass isotopomer distributions (MIDs) in  
103 proteinaceous amino acids (i.e., labeling patterns). No H<sub>2</sub> was detected at the time of harvesting,  
104 indicating that H<sub>2</sub> production was not involved in electron balance. High performance liquid  
105 chromatography (HPLC) analysis of culture supernatants revealed that malate was excreted by  
106 each strain but more so by the  $\Delta$ Calvin mutant (malate yield [mol/100 mol fumarate]  $\pm$  SD: WT,  
107 8.5  $\pm$  3.9;  $\Delta$ Calvin, 46.2  $\pm$  24.9).

108

109 We then used the <sup>13</sup>C-MFA software 13CFLUX2 (19) to estimate a set of fluxes that  
110 could explain the observed amino acid MIDs (Table S1), malate excretion, and the *Rs. rubrum*  
111 biomass composition (Table S2). For the *Rs. rubrum* biomass composition we determined the  
112 protein content (75  $\pm$  4% of dry cell weight [DCW]; Fig. S1) and amino acid composition (Table

113 S3), and assumed that the remaining composition was similar to that of *Rp. palustris* (10). Fitting  
114 algorithms used in <sup>13</sup>C-MFA can potentially generate multiple solutions. The fitting algorithm is  
115 automatically constrained for carbon balance but does not account for electron balance. Thus,  
116 one way to determine if an optimal solution is realistic is to examine whether it satisfies electron  
117 balance; the total flux through reductive reactions must equal the total flux through oxidative  
118 reactions. Neither flux map fully satisfied electron balance, but the violation for the  $\Delta$ Calvin  
119 mutant flux map was severe (Fig. S2); optimal solutions suggested that WT reductive fluxes  
120 (NAD(P)<sup>+</sup> generating) countered 86% of the oxidative fluxes (NAD(P)H generating) whereas  
121  $\Delta$ Calvin reductive fluxes countered only 56% of the oxidative fluxes. We therefore made a  
122 redox-constrained model wherein the sum of fluxes through reductive reactions must equal the  
123 fluxes through oxidative reactions. The optimal solutions from the redox-constrained models  
124 (Fig. 1, Table S4) identified a set of fluxes that could still explained the observed MIDs for both  
125 strains (Fig. 2A). However, like the flux solutions for the unconstrained models (Table S4), the  
126 optimal flux solutions were also unable to fully satisfy the expected fluxes to biomass and  
127 excreted malate for both strains (Fig. S3). Given this disagreement between simulated and  
128 experimental biomass fluxes and the need to introduce a redox constraint, we do not place high  
129 confidence in the resulting flux values. Nevertheless, the resulting optimal solutions point to  
130 qualitative trends that could contribute to electron balance, which we address below.

131  
132 **Reverse TCA cycle flux from  $\alpha$ -ketoglutarate to fumarate in *Rs. rubrum*.** Comparing the flux  
133 maps between WT *Rs. rubrum* and the  $\Delta$ Calvin mutant revealed lower gluconeogenic (GNG)  
134 flux in the mutant due to the combination of higher malate excretion and the absence of Calvin  
135 cycle activity. Also of note was bifurcated TCA cycle flux converging on  $\alpha$ KG for both strains

136 (Fig. 1). The reverse TCA cycle had previously been proposed as a mechanism by which a  
137 Calvin cycle mutant could achieve electron balance (14) based on  $\alpha$ KG synthase activity  
138 detected in *Rs. rubrum* cell extracts (17). Thus, despite the estimated small magnitude of the flux  
139 from fumarate to  $\alpha$ KG (< 1 mole % of the fumarate uptake rate) we questioned whether this  
140 reverse TCA cycle flux could be important for electron balance.

141  
142 We first wanted to verify that the reverse TCA cycle flux from fumarate to  $\alpha$ KG was  
143 associated with at least one signature labeling pattern; in other words, we asked what labeling  
144 patterns would be generated by reverse TCA cycle activity. We noticed that higher proportions  
145 of double and triple-labeled glutamate (Glu) were observed in the  $\Delta$ Calvin mutant compared to  
146 WT *Rs. rubrum* (Fig. 2). We reasoned that in the case of reverse TCA cycle flux from [1,4-  
147  $^{13}$ C]fumarate to  $\alpha$ KG, triple-labeled Glu could be generated when  $^{13}$ CO<sub>2</sub>, liberated from  
148 decarboxylation reactions in the catabolism of [1,4- $^{13}$ C]fumarate, would carboxylate [1,4-  
149  $^{13}$ C]succinyl-CoA to form triple-labeled  $\alpha$ KG, from which Glu is derived (Fig. 3A). Double-  
150 labeled Glu can be explained by unlabeled CO<sub>2</sub> participating in the same carboxylation of  
151 succinyl-CoA (Fig. 3B). The sources of unlabeled CO<sub>2</sub> could include catabolism of unlabeled  
152 fumarate carried over from the starter culture or repeated turns of the oxidative TCA cycle,  
153 which would eventually generate unlabeled CO<sub>2</sub> even from [1,4- $^{13}$ C]fumarate (Fig. 3B).

154  
155 To confirm that higher molecular weight (MW) Glu isotopomers were a signature of  
156 reverse TCA cycle flux, we ran fitting algorithms using a model in which TCA cycle flux was  
157 constrained to be strictly forward, or oxidative, with no reverse flux. Indeed, using this model  
158 with strictly forward TCA cycle for the  $\Delta$ Calvin mutant resulted in a disagreement between

159 simulated and observed Glu labeling patterns (Fig. 2). However, the WT optimal solutions from  
160 this model could explain the Glu labeling patterns (Fig. 2). Enrichment of higher MW amino  
161 acid isotopomers was a signature of Calvin cycle activity in our previous  $^{13}\text{C}$ -labeling studies  
162 with *Rp. palustris* (9, 10). Thus, in a WT model constrained to have only forward TCA cycle  
163 flux, the higher MW Glu isotopomers could still be explained from Calvin cycle activity. In the  
164  $\Delta$ Calvin mutant, reverse TCA cycle activity is the only pathway that can generate high MW Glu  
165 isotopomers, explaining the discrepancy between simulated and observed Glu MIDs when the  
166 TCA cycle was constrained to the forward direction.

167

168 MIDs from a separate labeling experiment, wherein WT and  $\Delta$ Calvin *Rs. rubrum* strains were  
169 cultured with unlabeled malate and  $\text{NaH}^{13}\text{CO}_3$  as a source of  $^{13}\text{CO}_2$ , also suggested reverse TCA  
170 cycle flux from fumarate to  $\alpha\text{KG}$  for both strains. In this case, the reverse TCA cycle flux was  
171 determined with greater confidence for the  $\Delta$ Calvin mutant at  $\sim 3 \pm 1$  mole % of the fumarate  
172 uptake rate (Fig. 4A). The standard deviation for this activity in the WT strain remained large  
173 (Fig. 4A), likely due to the possibility that the signature high MW Glu MIDs can also be  
174 generated by the Calvin cycle. Consistent with the previous labeling experiment, the  $\Delta$ Calvin  
175 mutant also exhibited a higher proportion of higher MW Glu isotopomers compared to the WT  
176 strain (Fig. 4B). Even though both the reverse TCA cycle and the Calvin cycle can generate  
177 higher MW Glu isotopomers, labeling patterns generated by the Calvin cycle are more likely to  
178 influence amino acids derived from glycolytic intermediates than from TCA cycle intermediates  
179 like  $\alpha\text{KG}$ , from which Glu is derived.  $\alpha\text{KG}$  labeling is expected to be more heavily influenced by  
180 the direct uptake of fumarate or malate nearby in the TCA cycle (9, 10). Thus the consistently  
181 elevated proportions of high MW Glu isotopomers in the  $\Delta$ Calvin mutant support the notion that



182 the labeling patterns were generated nearby and likely in response to the absence of the Calvin  
183 cycle.

184

185 **The *Rs. rubrum* gene annotated to encode  $\alpha$ KG synthase is not required to generate higher**

186 **MW Glu isotopomers.** We sought to genetically verify the involvement of the reverse TCA

187 cycle in maintaining electron balance in *Rs. rubrum*. The *Rs. rubrum* gene Rru\_A2721 is

188 annotated to encode the  $\alpha$ KG synthase  $\alpha$ -subunit, an enzyme normally required for reverse TCA

189 cycle flux. We deleted Rru\_A2721 in WT *Rs. rubrum* and in a  $\Delta$ PRK mutant, which lacks the

190 gene for the essential Calvin cycle enzyme phosphoribulokinase (PRK). The  $\Delta$ PRK mutant

191 cannot fix CO<sub>2</sub> via the Calvin cycle, has similar growth trends to the  $\Delta$ Calvin mutant (8), and

192 offered a convenient background for genetic engineering because, unlike the  $\Delta$ Calvin mutant, it

193 is not resistant to the antibiotic needed to select for integration of the suicide vector. We then

194 examined whether  $\Delta$ Rru\_A2721 mutants generated high MW Glu under <sup>13</sup>C-labeling conditions

195 permitting growth. Specifically, we compared amino acid MIDs from WT *Rs. rubrum* to those

196 from a  $\Delta$ Rru\_A2721 mutant grown with [1,4-<sup>13</sup>C]succinate, and we also compared patterns from

197 the  $\Delta$ PRK mutant and the  $\Delta$ PRK  $\Delta$ Rru\_A2721 mutant grown with [1,4-<sup>13</sup>C]succinate and DMSO

198 as an alternative electron acceptor to permit growth. Both strains with the  $\Delta$ Rru\_A2721 mutation

199 produced high MW Glu, including triple-labeled Glu (Table S1). There are three possibilities

200 that could explain this observation: (i) Rru\_A2721 does not encode  $\alpha$ KG synthase; (ii) *Rs.*

201 *rubrum* has redundant  $\alpha$ KG synthase activities; or (iii) in the case of the mutants lacking PRK,

202 the high MW Glu patterns are generated by an activity other than the reverse TCA cycle or the

203 Calvin cycle.

204

205 In considering other pathways that might generate high MW Glu isotopomers, the ethylmalonyl-  
206 CoA pathway was already ruled out because (i) it would not achieve electron balance during  
207 growth on malate (14) and (ii) our optimal flux solutions showed negligible flux through the  
208 ethylmalonyl-CoA pathway (Table S4). We also considered the involvement of CO  
209 dehydrogenase, which was previously found to be upregulated in an H<sub>2</sub>-producing *Rs. rubrum*  
210 Calvin cycle mutant (20). The authors speculated that CO dehydrogenase could contribute to  
211 electron balance by operating in reverse of the normally ascribed physiological direction,  
212 reducing CO<sub>2</sub> to CO with subsequent coupling of CO oxidation to H<sub>2</sub> production (20). However,  
213 we did not observe H<sub>2</sub> accumulation in our experiments nor would such a scenario explain the  
214 high MW Glu isotopomers. In acetogens, CO dehydrogenase can participate in the conversion of  
215 CO<sub>2</sub> to acetyl-CoA via the Wood-Ljungdahl pathway (21). This activity could contribute to label  
216 enrichment but the *Rs. rubrum* CO dehydrogenase is thought to be incapable of such activity  
217 (22). In agreement with this notion, including a reaction converting 2 CO<sub>2</sub> into AcCoA in a flux  
218 model unconstrained for electron balance and lacking the Calvin cycle resulted in solutions that  
219 favored cleavage of AcCoA into 2 CO<sub>2</sub> rather than the creation of AcCoA from CO<sub>2</sub> (Table S4).  
220 These solutions also preserved reverse TCA cycle flux from fumarate to αKG. Thus, although the  
221 possibility of another unknown reductive pathway in *Rs. rubrum* cannot be ruled out, the labeling  
222 patterns we have observed thus far point to the activity of reverse TCA cycle flux from fumarate  
223 to αKG.

224

225 **An *Rp. palustris* Calvin cycle mutant does not generate higher MW Glu isotopomers.** *Rs.*  
226 *rubrum* Calvin cycle mutants can grow on fumarate and malate, whereas *Rp. palustris* Calvin  
227 cycle mutants cannot unless they can dispose of excess electrons as H<sub>2</sub> (8). We therefore used

228 this knowledge to test the hypothesis that the increased proportion of high MW Glu isotopomers  
229 in the *Rs. rubrum*  $\Delta$ Calvin mutant is indicative of an electron-balancing mechanism that *Rs.*  
230 *rubrum* possesses but *Rp. palustris* does not. To test this notion, we performed four separate  
231 labeling experiments with the H<sub>2</sub>-producing NifA\* *Rp. palustris* strain CGA676 and its  $\Delta$ Calvin  
232 mutant counterpart, CGA4011 (8), using [1,4-<sup>13</sup>C]succinate, [1,4-<sup>13</sup>C]fumarate, unlabeled  
233 succinate with NaH<sup>13</sup>CO<sub>3</sub>, or unlabeled malate with NaH<sup>13</sup>CO<sub>3</sub>. Unlike the *Rs. rubrum*  $\Delta$ Calvin  
234 mutant, which showed a higher abundance of higher MW Glu than the WT strain, the *Rp.*  
235 *palustris*  $\Delta$ Calvin mutant showed a lower abundance of higher MW Glu compared to the parent  
236 NifA\* strain in all labeling experiments (Fig. 5). Thus, the higher MW Glu isotopomers  
237 observed in the *Rs. rubrum*  $\Delta$ Calvin mutant arose as the result of a pathway that distinguishes *Rs.*  
238 *rubrum* from *Rp. palustris*, with reverse TCA cycle flux from fumarate to  $\alpha$ KG as the likely  
239 candidate.

240  
241  **$\alpha$ KG-derived amino acids inhibit growth of a *Rs. rubrum* Calvin cycle mutant.** Similar to  
242 our findings for photoheterotrophic growth in *Rp. palustris* (9, 10), the small amount of flux to  
243  $\alpha$ KG in our *Rs. rubrum* flux maps suggests that the magnitude of the flux to  $\alpha$ KG is primarily  
244 dictated by the need for  $\alpha$ KG as a biosynthetic precursor.  $\alpha$ KG is a precursor for the amino acids  
245 Glu, Gln, Pro, and Arg, all of which are produced via reductive pathways and thus could also  
246 contribute to electron balance (Fig. 1C and 6A). Glu, Gln, Pro, and Arg are all inhibitors of their  
247 own synthesis pathways in *E. coli* (23-27). We predicted that if these amino acid synthesis  
248 pathways are similarly regulated in *Rs. rubrum* then their synthesis could be repressed by  
249 supplementing the growth medium with these amino acids; in this manner, supplementation with  
250 these amino acids might avert the reverse TCA cycle flux to  $\alpha$ KG. The addition of all four amino

251 acids (EQPR) had no effect on WT *Rs. rubrum* phototrophic growth trends on malate but  
252 prevented  $\Delta$ Calvin mutant culture growth (Fig. 6B). These results could be interpreted to mean  
253 that adding Glu, Gln, Pro, and Arg inhibited the respective amino acid synthesis pathways and  
254 thereby prevented electron balance. An alternative explanation could be that, even at 0.2 mM  
255 each, the catabolism of these amino acids could contribute to an excess of reducing power.  
256 However, adding four amino acids derived from oxaloacetate (DTMK) did not affect the growth  
257 of either the WT or the  $\Delta$ Calvin mutant on malate (Fig. 6C). The addition of either 0.7 mM  
258 isoleucine (Fig. 7) or 0.7 mM leucine (data not shown), both of which should also generate  
259 reducing power through their catabolism, also failed to affect the growth of the  $\Delta$ Calvin mutant  
260 on malate. While these results do not rule out the possibility of the catabolism of Glu, Gln, Pro,  
261 and Arg creating an electron imbalance, they show that the inhibitory effect of Glu, Gln, Pro, and  
262 Arg on the  $\Delta$ Calvin mutant was specific to this mixture. To verify that the growth inhibition  
263 caused by the  $\alpha$ KG-derived amino acids was linked to electron balance rather than an unrelated  
264 form of toxicity, we repeated the growth experiment in medium supplemented with the electron  
265 acceptor DMSO. Indeed, adding DMSO rescued  $\Delta$ Calvin mutant growth on malate in the  
266 presence of  $\alpha$ KG-derived amino acids (Fig. 6D). Thus, the addition of Glu, Gln, Pro, and Arg  
267 created a growth-inhibiting electron imbalance in the  $\Delta$ Calvin mutant.

268

269         Since the production of  $\alpha$ KG-derived amino acids appears to contribute to electron  
270 balance, one could expect the  $\Delta$ Calvin mutant to generate more of these amino acids. However,  
271 we did not observe a shift in biomass composition to favor the production of  $\alpha$ KG-derived amino  
272 acids in the  $\Delta$ Calvin mutant. Whole cell protein content and amino acid composition were  
273 similar between WT *Rs. rubrum* and the  $\Delta$ Calvin mutant (Fig. S1 and Table S3). Excretion of

274 these amino acids is also unlikely because (i) accumulation of  $\alpha$ KG-derived amino acids  
275 represses growth of the  $\Delta$ Calvin mutant (Fig. 6B) and (ii) excretion would leave electron  
276 disposal unconstrained and would thus allow for the  $\Delta$ Calvin mutant to achieve electron balance  
277 during phototrophic growth on succinate, which is not observed (8). Thus, the contribution of the  
278 combined reverse TCA cycle flux and synthesis of Glu, Gln, Pro, and Arg to electron balance is  
279 likely limited by the constraints of the *Rs. rubrum* biomass composition.

280  
281 **Isoleucine is produced exclusively by a reductive pathway in the *Rs. rubrum*  $\Delta$ Calvin**  
282 **mutant.** *Rs. rubrum* has two pathways for isoleucine synthesis. One pathway uses 1 oxaloacetate  
283 and 1 pyruvate, and the other uses 1 AcCoA and 2 pyruvate (Fig. 7A). While both pathways are  
284 technically reductive, we herein consider the AcCoA-utilizing pathway to be oxidative because  
285 the path from fumarate to 2 pyruvate + 1 AcCoA generates more reducing equivalents than can  
286 be oxidized in the subsequent synthesis of isoleucine (Fig. 7A). The optimal flux solutions for  
287 *Rs. rubrum* strains grown on [1,4- $^{13}$ C]fumarate estimated that the WT strain used the reductive  
288 pathway to make 72% of the isoleucine whereas 100% of isoleucine was made by the reductive  
289 pathway in the  $\Delta$ Calvin mutant (Fig. 7A). Flux solutions from conditions using unlabeled malate  
290 and Na $^{13}$ CO $_2$  were more skewed, indicating that 100% of isoleucine was made by the oxidative  
291 pathway in the WT strain whereas 100% of isoleucine was made by the reductive pathway in the  
292  $\Delta$ Calvin mutant (Fig. 7A). It is possible that the abundance of CO $_2$  in the malate + Na $^{13}$ CO $_2$   
293 condition alleviated the need for reductive isoleucine synthesis in the WT strain, for example, by  
294 stimulating Calvin cycle flux. Overall, our  $^{13}$ C-MFA results suggest a role for reductive  
295 isoleucine synthesis in maintaining electron balance, especially when Calvin cycle activity is  
296 absent, as in the  $\Delta$ Calvin mutant, or is limited by available CO $_2$ .

297

298 To assess whether the reductive isoleucine pathway was essential for electron balance in  
299 the absence of Calvin cycle activity, we deleted *ilvA*, encoding threonine dehydratase, in WT and  
300  $\Delta$ PRK mutant backgrounds to prevent isoleucine synthesis via the reductive pathway. We also  
301 grew WT and  $\Delta$ Calvin *Rs. rubrum* strains in the presence of isoleucine, which has the potential  
302 to inhibit both isoleucine synthesis pathways if they are regulated in *Rs. rubrum* as they are in *E.*  
303 *coli* (28) and *Leptospira interrogans* (29). Neither deleting *ilvA* (Fig. 7B) nor adding isoleucine  
304 to the growth medium (Fig. 7C) had a major effect on the growth trends of either the WT or the  
305 Calvin cycle mutants. Thus, while the  $^{13}\text{C}$  labeling patterns suggest that the flux through the two  
306 isoleucine synthesis pathways is influenced by the need to maintain electron balance, the  
307 reductive pathway is not essential for electron balance in *Rs. rubrum* Calvin cycle mutants.

308  
309 **Sulfide production does not participate in electron balance in *Rs. rubrum*.** In addition to the  
310 reverse TCA cycle flux suggested by the  $^{13}\text{C}$ -labeling patterns, we also considered whether  
311 pathways separate from carbon metabolism and  $\text{H}_2$  production could contribute to electron  
312 balance. Reduction of sulfate to sulfide by a spontaneous mutant of *Rb. sphaeroides* was  
313 previously implicated as an alternative electron balancing mechanism (30). However, we did not  
314 detect any sulfide in either WT or  $\Delta$ Calvin mutant cultures using lead acetate strips (Fig. 8).

315  
316 **Conclusion.** Overall, our data support previous results from our own group (8) and others (13)  
317 that *Rs. rubrum* can maintain electron balance during photoheterotrophic growth on relatively  
318 oxidized substrates without the Calvin cycle,  $\text{H}_2$  production, or access to alternative electron  
319 acceptors. While we consider it prudent to keep an open mind towards the possibility of an  
320 additional reductive pathway, our results suggest that a *Rs. rubrum* Calvin cycle mutant can

321 maintain electron balance during phototrophic growth on malate and fumarate by using different  
322 biosynthetic pathways. The relatively static nature of biomass composition for a given growth  
323 condition places constraints on the extent to which different biosynthetic pathways can be  
324 employed to achieve electron balance, and thus likely explains why a *Rs. rubrum* Calvin cycle  
325 mutant cannot grow with succinate, which has only two more electrons than malate or fumarate  
326 (8). Our flux estimates suggest that electron balance through biosynthetic pathways in a *Rs.*  
327 *rubrum* Calvin cycle mutant is possible (Fig. 1C) and that alternative reductive pathways for  
328 synthesizing certain amino acids likely participate in electron balance, specifically, (i) the  
329 coupling of reverse TCA cycle flux to the synthesis of amino acids derived from  $\alpha$ KG, and (ii)  
330 the use of a reductive pathway instead of an oxidative pathway for isoleucine synthesis. It is also  
331 possible that other biosynthetic pathways that would not be detected by our approach, such as  
332 altered fatty acid composition, could also offer limited flexibility to contribute to electron  
333 balance. Overall, our results highlight that while electron balance is a common challenge for all  
334 PNSB during photoheterotrophic growth, the strategies that come into play to address the  
335 challenge can differ between PNSB, with *Rs. rubrum* having electron-balancing mechanisms that  
336 others do not.

337

## 338 **Methods.**

339 **Strains and growth conditions.** *Rs. rubrum* strains  $\Delta$ Calvin (UR2557,  $\Delta$ *cbbM*::Gm<sup>R</sup>  
340  $\Delta$ *cbbP*::Km<sup>R</sup> (13)) and  $\Delta$ PRK (UR2565,  $\Delta$ *cbbP*::Km<sup>R</sup> (13)) were derived from type-strain UR2  
341 (32). *Rp. palustris* strains CGA676 (NifA\*, (10)) and CGA4011 (NifA\*,  $\Delta$ *cbbLS*,  $\Delta$ *cbbM*,  
342  $\Delta$ *cbbP*::Km<sup>R</sup> (8)) were derived from type-strain CGA009. *Bacillus subtilis* 3610 (33) and  
343 *Escherichia coli* strains NEB10 $\beta$  (New England Biolabs) and WM3064 were cultured  
344 aerobically on LB agar or in LB broth. WM3064 is a diaminopimelic acid (DAP) auxotroph and

345 was thus supplemented with 0.6 mM DAP (W. Metcalf, unpublished data). *E. coli* strains were  
346 stored in growth medium with 25% glycerol at -80°C. Other cultures were revived from 10%  
347 DMSO (*Rs. rubrum*) or 25% glycerol (*Rp. palustris*) frozen stocks by streaking for single  
348 colonies on photosynthetic medium (PM) agar (34) supplemented with 10 mM disodium  
349 succinate and 0.1% yeast extract without antibiotics for *Rs. rubrum* and *Rp. palustris*. Colonies  
350 were then used to inoculate 3 ml aerobic starter cultures of PM (*Rp. palustris*) or MA medium  
351 (*Rs. rubrum*) (8), each with 10 mM succinate. Aerobic starter cultures were grown at 30°C with  
352 shaking at 150 rpm. A 0.1 ml inoculum from stationary phase aerobic starter cultures was then  
353 transferred to 10 ml anaerobic PM (*Rp. palustris*) or MA (*Rs. rubrum*) supplemented with 10  
354 mM of an organic substrate as indicated in 28-ml anaerobic test tubes sealed with rubber  
355 stoppers under an argon headspace, as described (8). Where indicated, media was supplemented  
356 with specific amino acids at 20 mg/L each prior to inoculation. Antibiotics were not used in  
357 comparative growth experiments or <sup>13</sup>C-labeling experiments but were otherwise added to media  
358 where appropriate. Gentamycin and kanamycin were used at 100 µg/ml each for *Rp. palustris*  
359 and at 10 µg/ml each for *Rs. rubrum*. Gentamycin was used at 15 µg/ml for *E. coli*.

360 **Analytical techniques.** Cell density was assayed by optical density (OD<sub>660</sub>) using a Genesys 20  
361 visible spectrophotometer (Thermo-Fisher, Pittsburgh, PA). Specific growth rates were  
362 determined using measurements with values between 0.1 – 0.8 OD<sub>660</sub>, where a linear  
363 relationship between cell density and OD<sub>660</sub> was maintained. H<sub>2</sub> was sampled from culture  
364 headspace using a gas-tight syringe and analyzed using a Shimadzu GC-2014 gas chromatograph  
365 as described (35). Organic acid levels in culture supernatants were determined by HPLC  
366 (Shimadzu) as described (36). Sulfide was detected using lead acetate strips suspended above the  
367 cultures. Strips were removed and photographed once cultures reached stationary phase (31).



368 ***Rs. rubrum* biomass composition.** Measurements were performed for the WT strain (UR2) and  
369 the  $\Delta$ Calvin mutant (UR2557) grown in MA medium. Culture samples were taken between 0.08  
370 and 0.85 OD<sub>660</sub> and measured using plastic cuvettes with a 1-cm path length. DCWs were  
371 determined as described (37) by filtering 30 mL of culture through preweighed 0.22- $\mu$ m HA  
372 filters (Millipore) and then drying overnight at 80 °C. Protein was quantified using a  
373 bicinchoninic acid assay (Pierce) as described (10). Amino acid composition was determined  
374 using a Hitachi L-8800 amino acid analyzer at the University of California, Davis Molecular  
375 Structure Facility. The polyhydroxybutyrate content was previously found to be below the  
376 detection limit (8). Since protein accounted for 75% of the DCW, other major macromolecules  
377 were assumed to make up the same proportions of the remaining DCW not accounted for in  
378 protein as found in *Rp. palustris* and with the same monomeric composition. Biomass  
379 compositions for each strain were combined since the slopes for linear regression of DCW/L vs  
380 OD<sub>660</sub> ( $400 \pm 40$  mg/L/ OD<sub>660</sub>) and protein vs. DCW ( $75 \pm 4\%$  of DCW) were both found to be  
381 statistically similar (Fig. S1;  $p > 0.1$ , determined using the linear regression analysis function in  
382 Graphpad Prism 6.0h).

383 **<sup>13</sup>C-labeling experiments and metabolic flux analysis.** Three or four biological replicates of  
384 each strain were inoculated from unlabeled starter cultures into medium containing the indicated  
385 <sup>13</sup>C-labeled substrate, provided at 100%. Cultures were harvested in exponential phase between  
386 0.2 – 0.7 OD<sub>660</sub> as described previously (10). Amino acids were obtained from the cell pellets by  
387 hydrolysis in 6 N HCl, derivatized, and then MIDs determined using gas chromatography-mass  
388 spectrometry (GC-MS) as described (37). GC-MS analysis was performed at the Indiana  
389 University Mass Spectrometry Facility. MIDs were corrected for natural abundances of all atoms  
390 except for carbons in amino acid backbones using IsoCor software (38). Corrected amino acid

391 mass isotopomer distributions and flux measurements (i.e., excreted malate and fluxes derived  
392 from biomass composition (Table S2)) were used with a metabolic model mapping the carbon  
393 atom transitions through *Rs. rubrum* central metabolism (Table S4) using the software suite  
394 13CFLUX2 (19). Our *Rs. rubrum* model includes the TCA cycle, gluconeogenesis/glycolysis,  
395 the Calvin cycle, the pentose phosphate pathway, and the ethylmalonyl-CoA pathway (Table  
396 S4). Redox models that required that the sum of fluxes through reduction reactions equaled the  
397 sum of fluxes through oxidation reactions used the following constraint (wherein biosynthetic  
398 fluxes include those to EQPR):

399

400 WT:  $ECP1 + GNG2 + vIleT*5 + vIle\_alt + 1.264$  (biosynthetic NADPH oxidation) - 0.395  
401 (biosynthetic NAD<sup>+</sup> reduction) - oppp - vPyrDH - vME - MalDH - SDH - aKGDH1 - aKGDH2 -  
402 IDH = 0

403  $\Delta$ Calvin:  $ECP1 + GNG2 + vIleT*5 + vIle\_alt + 0.753$  (biosynthetic NADPH oxidation) - 0.235  
404 (biosynthetic NAD<sup>+</sup> reduction) - oppp - vPyrDH - vME - MalDH - SDH - aKGDH1 - aKGDH2 -  
405 IDH = 0

406

407 For each condition or model variation tested, at least 100 different arrangements of starting free  
408 parameter values was chosen at random using the 13CFLUX2 program, multifit. An optimal  
409 solution was selected based on that which has the lowest sum of squared residuals between  
410 simulated and measured data sets of MIDs and biosynthetic and extracellular fluxes. Standard  
411 deviations for flux values were determined using the 13CFLUX2 linearized statistical analysis  
412 program, fwdsim.

413 ***Rs. rubrum* strain construction.** To create an in-frame deletion of Rru\_A2721 ( $\alpha$ KG synthase  
414  $\alpha$ -subunit), the region upstream Rru\_A2721 was amplified using primers BL50  
415 (gacttctagactataacgatctggccgattggc) and BL524 (gactggtaccctcatcatccgtctttcagagaag) and the  
416 region downstream was amplified using primers BL525 (gactggtaccaggagagatgatcatggatacg)  
417 and BL504 (gacttctagaactgggcttcgatttcggtgaa). The resulting PCR products were digested using  
418 KpnI, ligated together, and then the ligation reaction was used as template for a second round of  
419 PCR using primers BL501 and BL504. The resulting PCR product was purified, digested with  
420 XbaI, and then ligated into XbaI-digested pJQ200SK (39). To create an in-frame deletion of  
421 Rru\_A2877 (*ilvA*, threonine deaminase), the upstream region was amplified using BL646  
422 (gctggagctccaccgtgactccgtctggccccaag) and BL635 (tccccggcggtcatcgtccgcctcc) and the  
423 downstream region was amplified using BL636 (cgatgaccgcccgggattagggaatc) and BL647  
424 (attcctgcagcccggcgtcgattacaccggcctc). The upstream and downstream PCR products were mixed  
425 with pJQ200SK, which was PCR-linearized using BL644 (cggaggagctccagcttttg) and BL645  
426 (ccgggctgcaggaattcg), and then assembled by Gibson Assembly (NEB). Ligation and Gibson  
427 reactions were transformed into *E. coli* NEB10 $\beta$  (New England Biolabs) and transformants  
428 verified by PCR and sequencing. Vectors were then introduced into electrocompetent *E.*  
429 *coli* WM3064.  
430 Vectors containing deletion constructs were transferred to *Rs. rubrum* strains by conjugation  
431 with WM3064 on PM agar with yeast extract, succinate, and DAP. Mating patches were streaked  
432 for single recombinants on PM agar with yeast extract, succinate, and Gm. Colonies were then  
433 grown in liquid media without Gm to allow for a second recombination event. Cultures were  
434 plated to PM agar with yeast extract, succinate, and 10% sucrose, screened for Gm sensitivity,  
435 and then Gm-sensitive colonies were screened by PCR for the desired mutations.

436 **Acknowledgements.** This work was funded by the Indiana University College of Arts and  
437 Sciences. We thank GC Gordon for contributions to preliminary studies and JA Karty for GCMS  
438 training and advice.

439

#### 440 **References**

- 441 1. Erb TJ. 2011. Carboxylases in natural and synthetic microbial pathways. *Appl Environ*  
442 *Microbiol* 77:8466-8477.
- 443 2. Muller FM. 1933. On the metabolism of the purple sulphur bacteria in organic media. *Arch*  
444 *Microbiol* 4:131-166.
- 445 3. Hallenbeck PL, Lerchen R, Hessler P, Kaplan S. 1990. Roles of CfxA, CfxB, and external  
446 electron acceptors in regulation of ribulose 1,5-bisphosphate carboxylase/oxygenase  
447 expression in *Rhodobacter sphaeroides*. *J Bacteriol* 172:1736-1748.
- 448 4. Hallenbeck PL, Lerchen R, Hessler P, Kaplan S. 1990. Phosphoribulokinase activity and  
449 regulation of CO<sub>2</sub> fixation critical for photosynthetic growth of *Rhodobacter sphaeroides*. *J*  
450 *Bacteriol* 172:1749-1761.
- 451 5. Paoli GC, Vichivanives P, Tabita FR. 1998. Physiological control and regulation of the  
452 *Rhodobacter capsulatus cbb* operons. *J Bacteriol* 180:4258-4269.
- 453 6. Falcone DL, Tabita FR. 1991. Expression of endogenous and foreign ribulose 1,5-  
454 bisphosphate carboxylase-oxygenase (RubisCO) genes in a RubisCO deletion mutant of  
455 *Rhodobacter sphaeroides*. *J Bacteriol* 173:2099-2108.
- 456 7. McCully AL, McKinlay JB. 2016. Disrupting Calvin cycle phosphoribulokinase activity in  
457 *Rhodospseudomonas palustris* increases the H<sub>2</sub> yield and specific production rate  
458 proportionately. *Int J Hydrogen Energy* 41:4143-4149.
- 459 8. Gordon GC, McKinlay JB. 2014. Calvin cycle mutants of photoheterotrophic purple  
460 nonsulfur bacteria fail to grow due to an electron imbalance rather than toxic metabolite  
461 accumulation. *J Bacteriol* 196:1231-1237.
- 462 9. McKinlay JB, Harwood CS. 2011. Calvin cycle flux, pathway constraints, and substrate  
463 oxidation state together determine the H<sub>2</sub> biofuel yield in photoheterotrophic bacteria. *mBio*  
464 2: e01620-17.
- 465 10. McKinlay JB, Harwood CS. 2010. Carbon dioxide fixation as a central redox cofactor  
466 recycling mechanism in bacteria. *Proc Natl Acad Sci U S A* 107:11669-11675.
- 467 11. Farmer RM, Laguna R, Panescu J, McCoy A, Logsdon B, Zianni M, Moskvina OV,  
468 Gomelsky M, Tabita FR. 2014. Altered residues in key proteins influence the expression and  
469 activity of the nitrogenase complex in an adaptive CO<sub>2</sub> fixation-deficient mutant strain of  
470 *Rhodobacter sphaeroides*. *Microbiology* 160:198-208.
- 471 12. Öztürk Y, Gökçe A, Peksel B, Gürkan M, Özgür E, Gündüz U, Eroğlu I, Yücel M. 2012.  
472 Hydrogen production properties of *Rhodobacter capsulatus* with genetically modified redox  
473 balancing pathways. *Int J Hydrogen Energy* 37:2014–2020.
- 474 13. Wang D, Zhang Y, Pohlmann EL, Li J, Roberts GP. 2011. The poor growth of  
475 *Rhodospirillum rubrum* mutants lacking RubisCO is due to the accumulation of ribulose-1,5-  
476 bisphosphate. *J Bacteriol* 193:3293-3303.

- 477 14. Hädicke O, Grammel H, Klamt S. 2011. Metabolic network modeling of redox balancing and  
478 biohydrogen production in purple nonsulfur bacteria. *BMC Syst Biol* 5:150.
- 479 15. Wang X, Modak HV, Tabita FR. 1993. Photolithoautotrophic growth and control of CO<sub>2</sub>  
480 fixation in *Rhodobacter sphaeroides* and *Rhodospirillum rubrum* in the absence of ribulose  
481 biphosphate carboxylase-oxygenase. *J Bacteriol* 175:7109-7114.
- 482 16. De Meur Q, Deutschbauer A, Koch M, Wattiez R, Leroy B. 2018. Genetic plasticity and  
483 ethylmalonyl coenzyme A pathway during acetate assimilation in *Rhodospirillum rubrum*  
484 S1H under photoheterotrophic conditions. *Appl Environ Microbiol* 84: e02038-17.
- 485 17. Buchanan BB, Evans MC, Arnon DI. 1967. Ferredoxin-dependent carbon assimilation in  
486 *Rhodospirillum rubrum*. *Arch Mikrobiol* 59:32-40.
- 487 18. Buescher JM, Antoniewicz MR, Boros LG, Burgess SC, Brunengraber H, Clish CB,  
488 DeBerardinis RJ, Feron O, Frezza C, Ghesquiere B, Gottlieb E, Hiller K, Jones RG,  
489 Kamphorst JJ, Kibbey RG, Kimmelman AC, Locasale JW, Lunt SY, Maddocks OD, Malloy  
490 C, Metallo CM, Meuillet EJ, Munger J, Noh K, Rabinowitz JD, Ralser M, Sauer U,  
491 Stephanopoulos G, St-Pierre J, Tennant DA, Wittmann C, Vander Heiden MG, Vazquez A,  
492 Vousden K, Young JD, Zamboni N, Fendt SM. 2015. A roadmap for interpreting <sup>13</sup>C  
493 metabolite labeling patterns from cells. *Curr Opin Biotechnol* 34:189-201.
- 494 19. Weitzel M, Noh K, Dalman T, Niedenfuhr S, Stute B, Wiechert W. 2013. 13CFLUX2-high-  
495 performance software suite for <sup>13</sup>C-metabolic flux analysis. *Bioinformatics* 29:143-145.
- 496 20. Joshi HM, Tabita FR. 2000. Induction of carbon monoxide dehydrogenase to facilitate redox  
497 balancing in a ribulose biphosphate carboxylase/oxygenase-deficient mutant strain of  
498 *Rhodospirillum rubrum*. *Arch Microbiol* 173:193-199.
- 499 21. Ragsdale SW, Pierce E. 2008. Acetogenesis and the Wood-Ljungdahl pathway of CO<sub>2</sub>  
500 fixation. *Biochim Biophys Acta* 1784:1873-1898.
- 501 22. Bonam D, Ludden PW. 1987. Purification and characterization of carbon monoxide  
502 dehydrogenase, a nickel, zinc, iron-sulfur protein, from *Rhodospirillum rubrum*. *J Biol Chem*  
503 262:2980-2987.
- 504 23. Perez-Arellano I, Rubio V, Cervera J. 2006. Mapping active site residues in glutamate-5-  
505 kinase. The substrate glutamate and the feed-back inhibitor proline bind at overlapping sites.  
506 *FEBS Lett* 580:6247-6253.
- 507 24. Caspi R, Billington R, Fulcher CA, Keseler IM, Kothari A, Krummenacker M, Latendresse  
508 M, Midford PE, Ong Q, Ong WK, Paley S, Subhraveti P, Karp PD. 2018. The MetaCyc  
509 database of metabolic pathways and enzymes. *Nucleic Acids Res* 46:D633-D639.
- 510 25. Leisinger T, Haas D. 1975. N-Acetylglutamate synthase of *Escherichia coli* regulation of  
511 synthesis and activity by arginine. *J Biol Chem* 250:1690-1693.
- 512 26. Jiang P, Peliska JA, Ninfa AJ. 1998. The regulation of *Escherichia coli* glutamine synthetase  
513 revisited: role of 2-ketoglutarate in the regulation of glutamine synthetase adenylation state.  
514 *Biochemistry* 37:12802-12810.
- 515 27. Miller RE, Stadtman ER. 1972. Glutamate synthase from *Escherichia coli*. An iron-sulfide  
516 flavoprotein. *J Biol Chem* 247:7407-7419.
- 517 28. Eisenstein E, Yu HD, Schwarz FP. 1994. Cooperative binding of the feedback modifiers  
518 isoleucine and valine to biosynthetic threonine deaminase from *Escherichia coli*. *J Biol*  
519 *Chem* 269:29423-29429.
- 520 29. Xu H, Zhang Y, Guo X, Ren S, Staempfli AA, Chiao J, Jiang W, Zhao G. 2004. Isoleucine  
521 biosynthesis in *Leptospira interrogans* serotype lai strain 56601 proceeds via a threonine-  
522 independent pathway. *J Bacteriol* 186:5400-5409.

- 523 30. Rizk ML, Laguna R, Smith KM, Tabita FR, Liao JC. 2011. Redox homeostasis phenotypes  
524 in RubisCO-deficient *Rhodobacter sphaeroides* via ensemble modeling. *Biotechnol Prog*  
525 27:15-22.
- 526 31. Xia Y, Lu C, Hou N, Xin Y, Liu J, Liu H, Xun L. 2017. Sulfide production and oxidation by  
527 heterotrophic bacteria under aerobic conditions. *ISME J* 11:2754-2766.
- 528 32. Fitzmaurice WP, Saari LL, Lowery RG, Ludden PW, Roberts GP. 1989. Genes coding for  
529 the reversible ADP-ribosylation system of dinitrogenase reductase from *Rhodospirillum*  
530 *rubrum*. *Mol Gen Genet* 218:340-347.
- 531 33. Kearns DB, Losick R. 2003. Swarming motility in undomesticated *Bacillus subtilis*. *Mol*  
532 *Microbiol* 49:581-590.
- 533 34. Kim M, Harwood CS. 1991. Regulation of benzoate-CoA ligase in *Rhodopseudomonas*  
534 *palustris*. *FEMS Microbiol Lett* 83:199-203.
- 535 35. Huang JJ, Heiniger EK, McKinlay JB, Harwood CS. 2010. Production of hydrogen gas from  
536 light and the inorganic electron donor thiosulfate by *Rhodopseudomonas palustris*. *Appl*  
537 *Environ Microbiol* 76:7717-7722.
- 538 36. McKinlay JB, Zeikus JG, Vieille C. 2005. Insights into *Actinobacillus succinogenes*  
539 fermentative metabolism in a chemically defined growth medium. *Appl Environ Microbiol*  
540 71:6651-6656.
- 541 37. McKinlay JB, Shachar-Hill Y, Zeikus JG, Vieille C. 2007. Determining *Actinobacillus*  
542 *succinogenes* metabolic pathways and fluxes by NMR and GC-MS analyses of <sup>13</sup>C-labeled  
543 metabolic product isotopomers. *Metab Eng* 9:177-192.
- 544 38. Millard P, Letisse F, Sokol S, Portais JC. 2012. IsoCor: correcting MS data in isotope  
545 labeling experiments. *Bioinformatics* 28:1294-1296.
- 546 39. Quandt J, Hynes MF. 1993. Versatile suicide vectors which allow direct selection for gene  
547 replacement in gram-negative bacteria. *Gene* 127:15-21.

548 **Figures and legends**

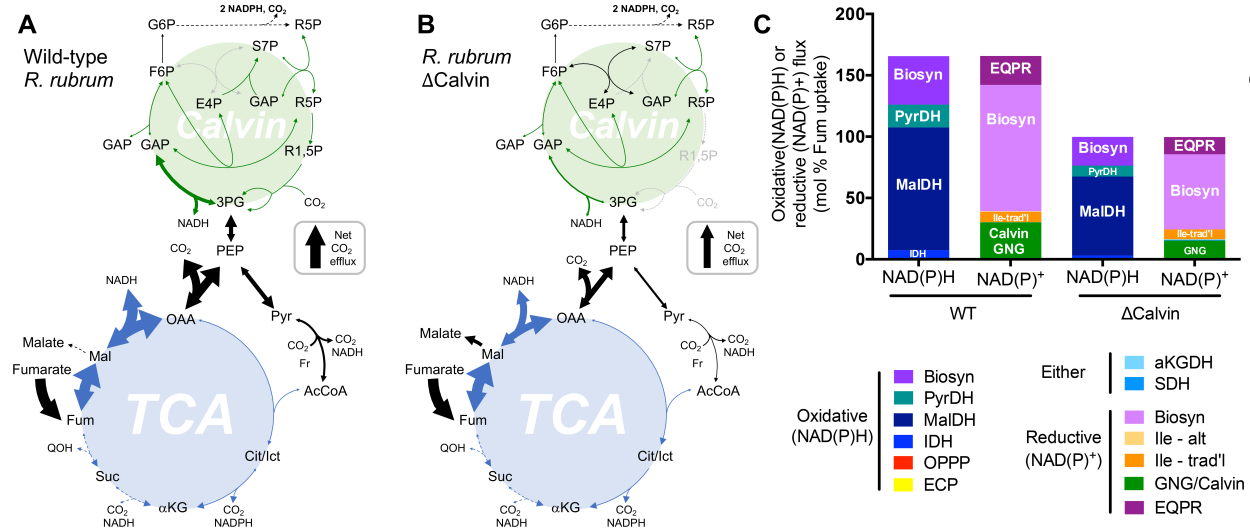

549  
 550 **Fig. 1.** Redox-constrained flux models suggest reverse TCA cycle flux from fumarate to  $\alpha$ KG for  
 551 WT *Rs. rubrum* (UR2) (A) and the  $\Delta$ Calvin mutant (UR2557) (B) grown phototrophically on  
 552 malate. The ethylmalonyl-CoA pathway was estimated to carry negligible flux and is not shown  
 553 for simplicity. Flux magnitudes are indicated by arrow thickness. Net flux direction is indicated  
 554 by an enlarged arrowhead. Fluxes that have a value of less than 1 mol % of the fumarate uptake  
 555 rate are shown as dashed arrows. (C) Comparison of fluxes through redox reactions. NAD(P)H  
 556 columns refer to those reactions that reduce electron carriers (oxidative pathways), whereas  
 557 NAD(P)<sup>+</sup> columns refer to those reactions that oxidize electron carriers (reductive pathways).  
 558 Biosyn, biosynthesis; PyrDH, pyruvate dehydrogenase; MalDH, malate dehydrogenase; IDH,  
 559 isocitrate dehydrogenase; OPPP, oxidative pentose phosphate pathway; ECP, ethylmalonyl-CoA  
 560 pathway; aKGDH,  $\alpha$ KG dehydrogenase/synthase; SDH, succinate dehydrogenase; Ile – alt,  
 561 isoleucine synthesis from pyruvate and AcCoA; Ile – trad'l, isoleucine synthesis from pyruvate  
 562 and oxaloacetate; GNG/Calvin, glyceraldehyde-3-phosphate dehydrogenase in either  
 563 gluconeogenesis or the Calvin cycle; EQPR, synthesis of Glu, Gln, Pro, and Arg. (A-C) All  
 564 fluxes are normalized to the fumarate uptake rate for each strain. Absolute flux values were 1.73

565  $\pm 0.09$  and  $0.66 \pm 0.16$  mmol fumarate / g DCW/ h  $\pm$  SD, for the WT and  $\Delta$ Calvin mutant,  
 566 respectively. All flux values are in Table S4.

567

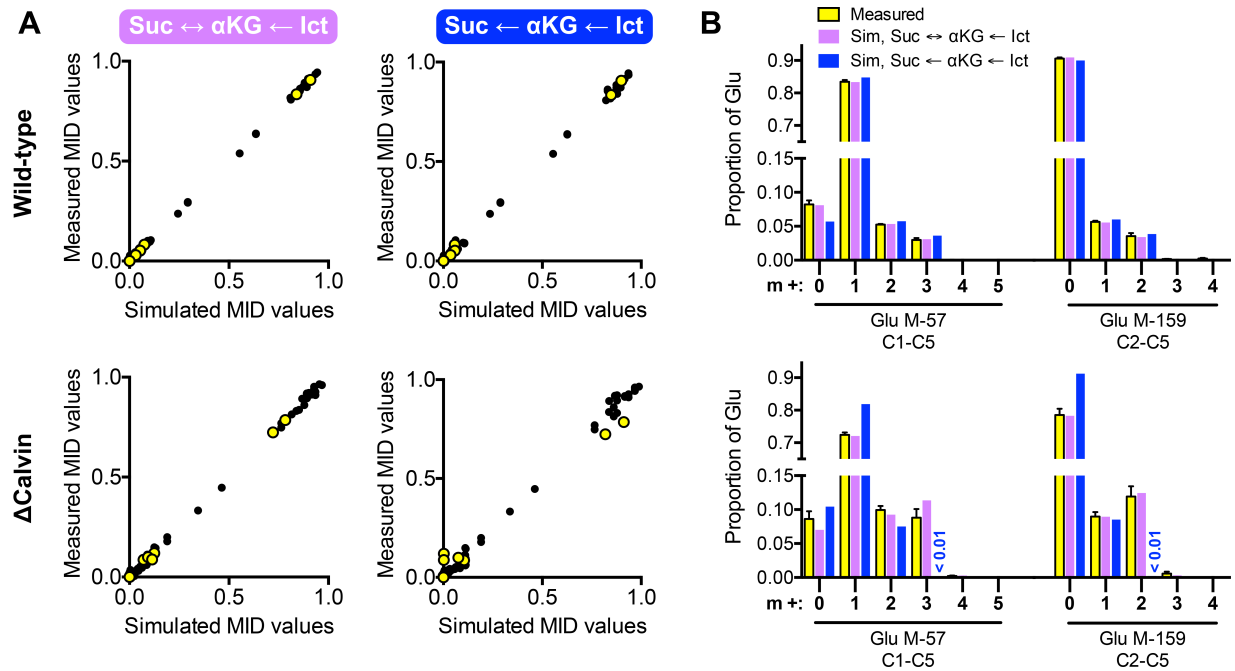

568

569 **Fig. 2.** Reverse TCA cycle flux is required to explain Glu MIDs in the *Rs. rubrum*  $\Delta$ Calvin

570 mutant. (A, B) Top, WT *Rs. rubrum* (UR2); bottom, *Rs. rubrum*  $\Delta$ Calvin (UR2557). **A.** Linear

571 regression of measured vs simulated MID values from the optimal flux solutions for strains

572 grown with [1,4- $^{13}$ C]fumarate. Simulations used a flux model that either allowed (left) or did not

573 allow (right) for reversible flux between succinate (Suc) and  $\alpha$ KG. Irreversible flux from

574 isocitrate (Ict) to  $\alpha$ KG was assumed for all flux models. Yellow, Glu MIDs; black, MIDs for all

575 other examined amino acids. **B.** Comparison of measured and simulated (Sim) Glu MIDs from

576 panel A. Error bars, SD; n=4.

577

578



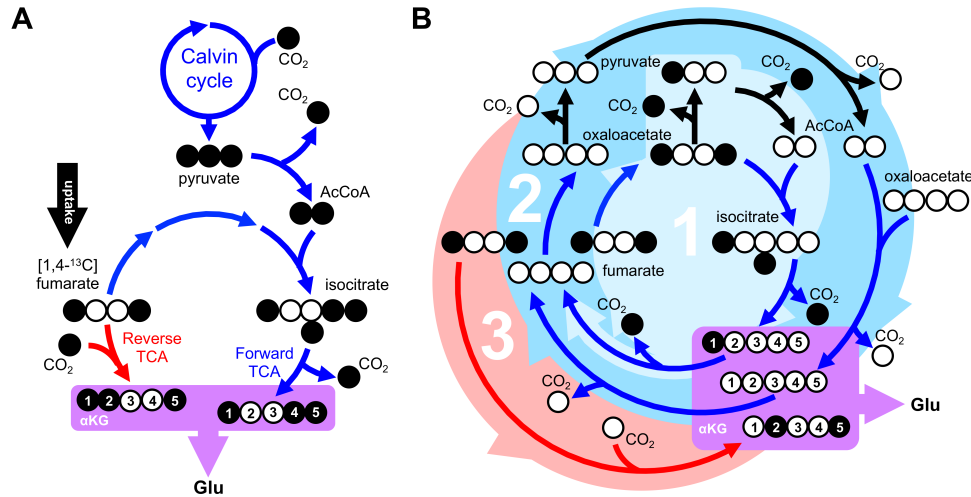

579

580 **Fig. 3.** Possible mechanisms leading to the production of triple-labeled glutamate (A) or lower  
 581 MW glutamate isotopomers (B) from [1,4-<sup>13</sup>C]fumarate in *Rs. rubrum*. Note that double- and  
 582 triple-labeled glutamate are each expected to arise from reverse TCA cycle activity, especially in  
 583 a  $\Delta$ Calvin mutant. Black, <sup>13</sup>C; white, <sup>12</sup>C.

584

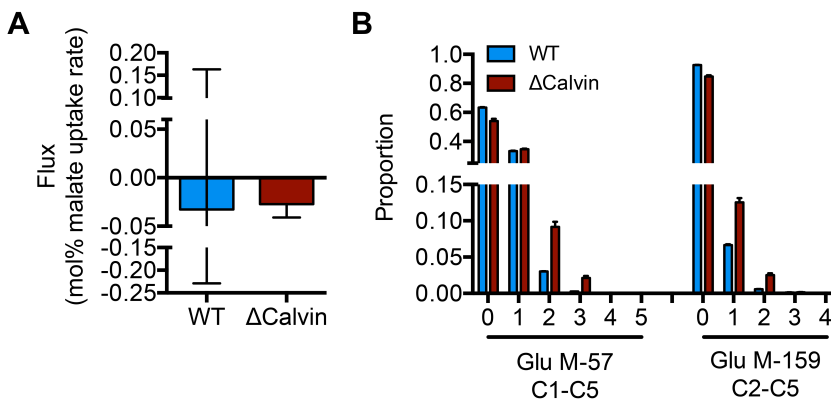

585

586 **Fig. 4.** Flux estimates from MIDIs generated during phototrophic growth on unlabeled malate and  
 587 NaH<sup>13</sup>CO<sub>3</sub> suggest reverse TCA cycle flux from fumarate to  $\alpha$ KG in the *Rs. rubrum*  $\Delta$ Calvin  
 588 mutant. (A) Estimate flux through  $\alpha$ KG dehydrogenase/synthase (positive:  $\alpha$ KG  $\rightarrow$  succinate;  
 589 negative: succinate  $\rightarrow$   $\alpha$ KG) from the optimal flux solutions. (B) Comparison of measured Glu  
 590 MIDIs from the WT strain (UR2) and the  $\Delta$ Calvin mutant (UR2557). Error bars, SD; n=3.

591

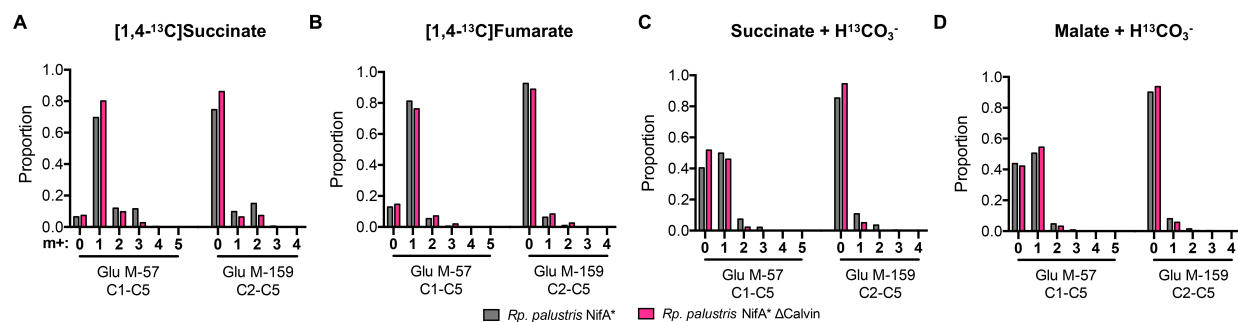

592

593 **Fig. 5.** Glu MIDs from *Rp. palustris* NifA\* (CGA676) and a *Rp. palustris* NifA\* Calvin cycle  
 594 mutant (CGA4011) grown phototrophically on [1,4-<sup>13</sup>C]succinate (A), [1,4-<sup>13</sup>C]fumarate (B),  
 595 succinate + NaH<sup>13</sup>CO<sub>3</sub> (C), or malate + NaH<sup>13</sup>CO<sub>3</sub> (D). CGA676 data from [1,4-<sup>13</sup>C]succinate  
 596 and [1,4-<sup>13</sup>C]fumarate conditions were reported previously (9).

597

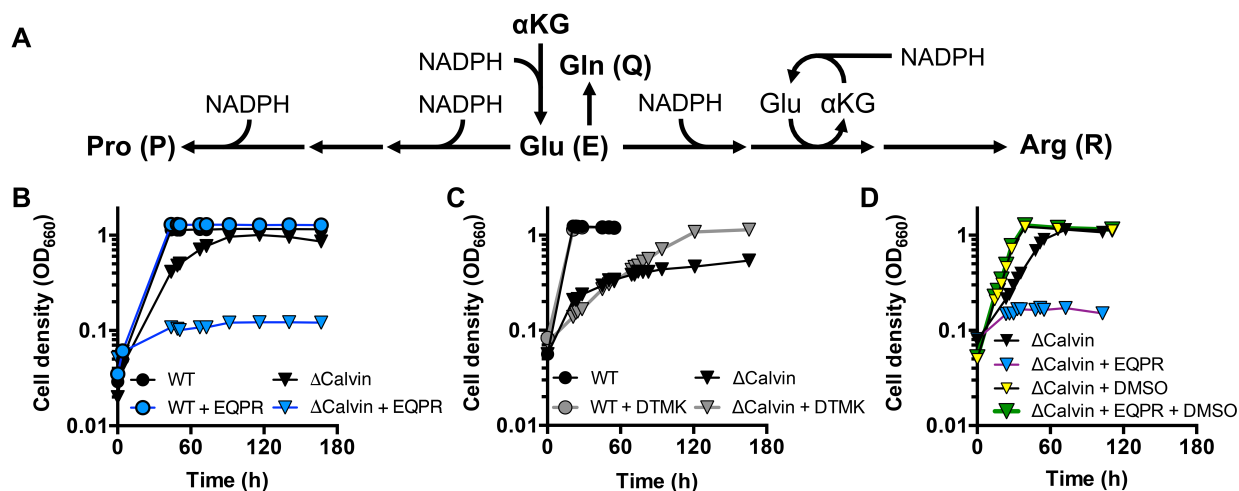

598

599 **Fig. 6.**  $\alpha$ KG-derived amino acids represses phototrophic growth of the *Rs. rubrum*  $\Delta$ Calvin  
 600 mutant on malate. (A) Abbreviated pathway illustrating the redox reactions involved in the  
 601 synthesis of the four amino acids synthesized from  $\alpha$ KG-derived. (B-D) Growth curves for WT  
 602 and the  $\Delta$ Calvin mutant grown with either a mixture of glutamate, glutamine, proline, and  
 603 arginine (EQPR) (B) with or without DMSO (D) or with a mixture of aspartate, threonine,  
 604 methionine, and lysine (C; DTMK).

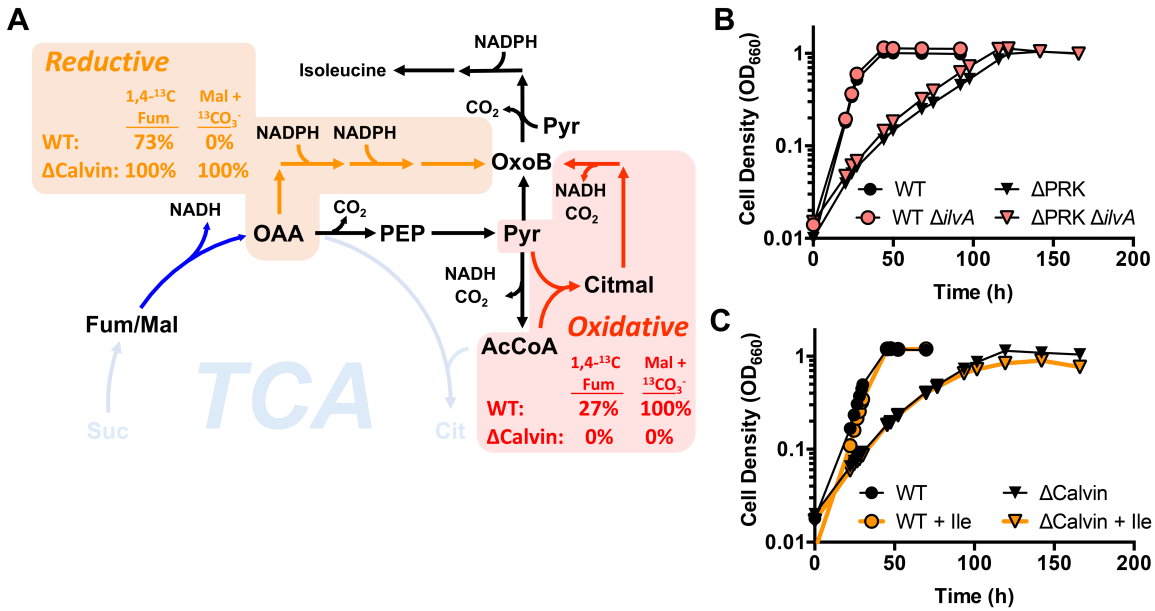

605

606 **Fig. 7. *Rs. rubrum* Calvin cycle mutants use a non-essential reductive isoleucine synthesis**

607 **pathway.** (A) Estimated fluxes as a percent of total isoleucine synthesis for the reductive

608 (orange) and oxidative (red) isoleucine synthesis pathways for the WT and ΔCalvin strains

609 during growth on either [1,4-<sup>13</sup>C]fumarate or malate with NaHC<sup>13</sup>O<sub>3</sub>. (B) Effect of deleting the

610 *ilvA*, encoding threonine deaminase in the reductive isoleucine synthesis pathway, on growth

611 trends in WT and ΔPRK backgrounds. (C) Effect of adding isoleucine on the growth trends of

612 WT and ΔCalvin strains.

613

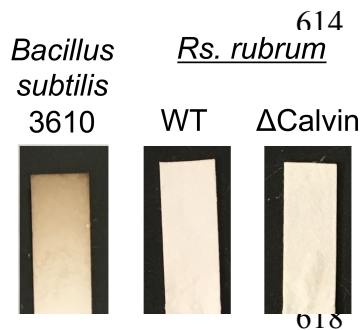

**Fig. 8. *Rs. rubrum* cultures test negative for sulfide production**

using lead acetate strips. Strips darken when exposed to sulfide.

An aerobic culture of *Bacillus subtilis* 3610 grown in LB medium

was used as a positive control for sulfide production (31). Similar

trends were observed for 2 other biological replicates.

619

620 **Supplementary figures and legends**

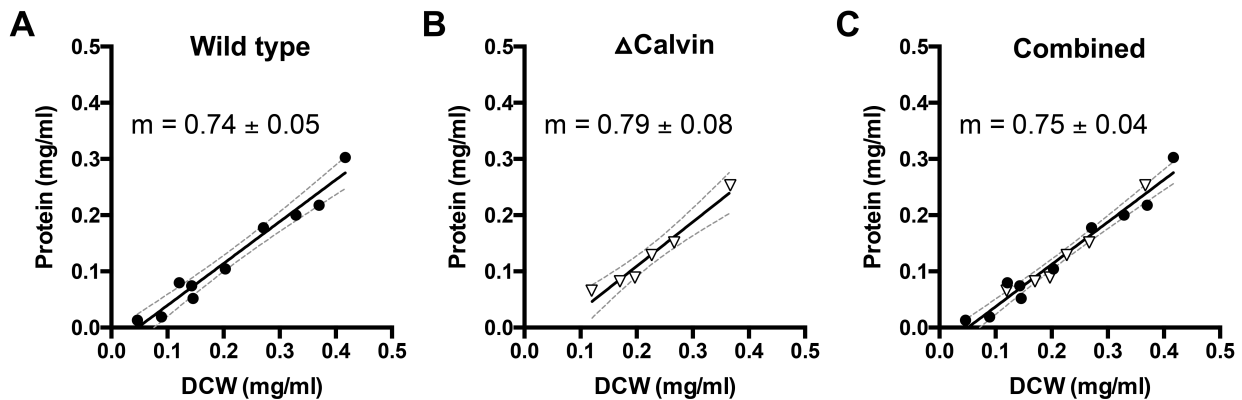

621

622 **Fig S1.** Protein makes up 75% of *Rs. rubrum* DCW based on linear regression. WT (UR2; A)  
623 and the  $\Delta$ Calvin mutant (UR2557; B) were grown in MA medium with 10 mM disodium  
624 fumarate. The solid line indicates the averaged slope and the dashed lines show 95% CI. There  
625 was no statistical difference between the slopes for the WT and  $\Delta$ Calvin plots according to a  
626 linear regression analysis by Graphpad Prism 6.0h. Therefore the combined data were used to  
627 determine the *Rs. rubrum* protein content (C).

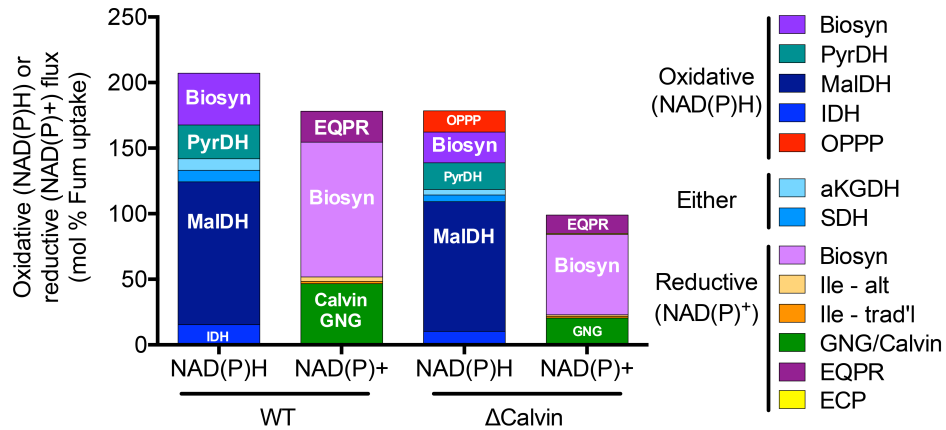

628

629 **Fig. S2.** Unconstrained flux solutions for WT *Rs. rubrum* (UR2; A) and the  $\Delta$ Calvin mutant  
 630 (UR2557; B) grown phototrophically on [1,4- $^{13}$ C]fumarate do not satisfy electron balance.

631 Fluxes through reactions that either reduce electron carriers (oxidative pathways; NAD(P)H) or  
 632 oxidize electron carriers (reductive pathways; NAD(P) $^{+}$ ) are shown. A complete set of flux  
 633 values is available in Table S4.

634

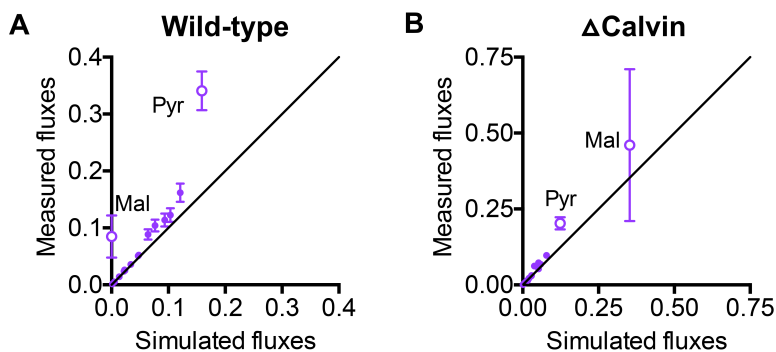

635

636 **Fig. S3 *Rs. rubrum* flux models fail to fully explain biomass composition.** Flux values are  
 637 mole % of fumarate uptake rate. Each symbol represents either malate excretion (Mal) or the  
 638 total flux from a central metabolite needed to make components of biomass according to Table  
 639 S2 (e.g., the flux from pyruvate [Pyr] needed to make fatty acids, amino acids, etc.). Error bars,  
 640 SD. SD for malate was based on experimental measurements. SD for other biomass fluxes was  
 641 assumed to be 10% of the flux value.
